# Supplementary material for: Thermodynamic insights into the Ba–S system for the formation of BaZrS3 perovskites and other Ba sulfides
Source: Royal Society of Chemistry journal article supplement (doi:10.1039/d5ta00798d), 2025-01-01
Supplement: d5ta00798d1.pdf [file d5ta00798d1.pdf]

# Thermodynamic insights into the Ba-S system for the formation of BaZrS<sub>3</sub> perovskites and other Ba sulfides

## SUPPORTING INFORMATION

*Corrado Comparotto*<sup>\*,1</sup>, *Lucy Whalley*<sup>2</sup>, *Kostiantyn Sopiha*<sup>1</sup>, *Robert J.W. Frost*<sup>3</sup>, *Tomas Kubart*<sup>4</sup>, and *Jonathan J. S. Scragg*<sup>1</sup>

<sup>1</sup>Division of Solar Cell Technology, Department of Materials Science and Engineering, Uppsala University, Uppsala 75237, Sweden

\*Email: [corrado.comparotto@angstrom.uu.se](mailto:corrado.comparotto@angstrom.uu.se)

<sup>2</sup>Department of Mathematics, Physics and Electrical Engineering, Northumbria University, Newcastle, United Kingdom

<sup>3</sup>Division of Applied Nuclear Physics, [Department of Physics and Astronomy](#), Uppsala University, Uppsala 75237, Sweden

<sup>4</sup>Division of Solid State Electronics, Department of Electrical Engineering, Uppsala University, Uppsala 75237, Sweden

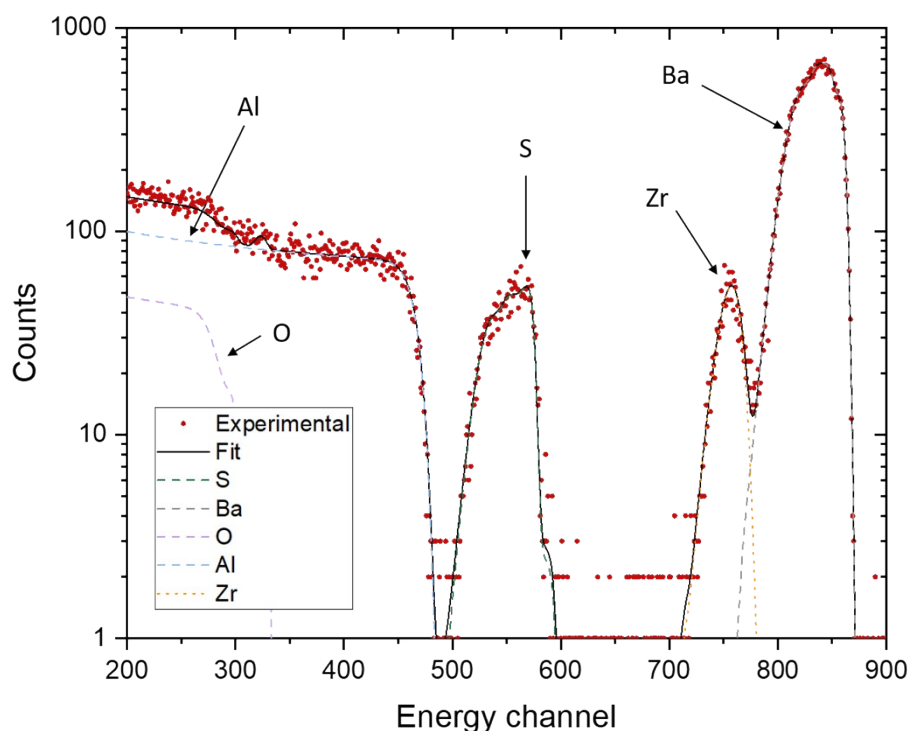

**Figure S1:** RBS analysis of a sample sulfurized with  $T_S$  and  $T_{\text{sample}}$  of 100 and 488 °C, respectively. The estimated total ratio of [Ba] to [S] is 1:1.

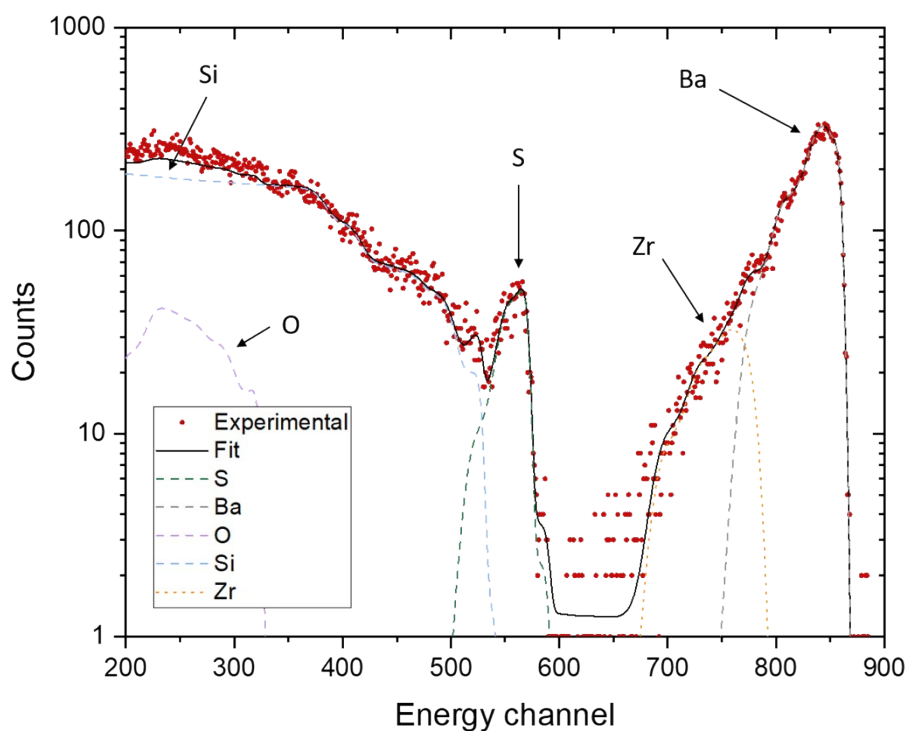

**Figure S2:** RBS analysis of a sample sulfurized with  $T_S$  and  $T_{\text{sample}}$  of 165 and 548 °C, respectively. The estimated total ratio of [Ba] to [S] is 1:1.5.

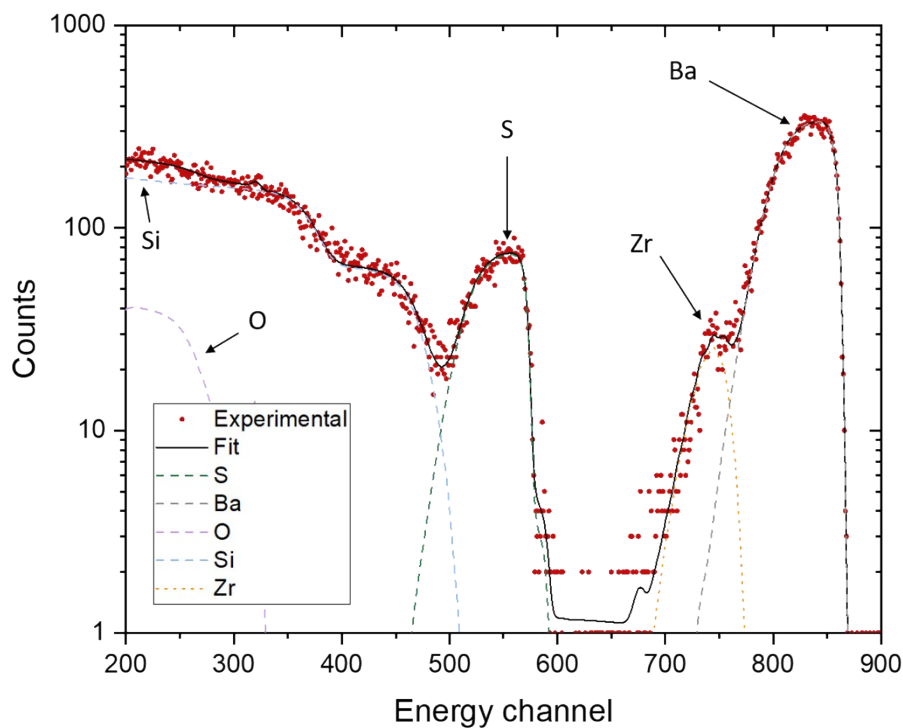

**Figure S3:** RBS analysis of a sample sulfurized with  $T_S$  and  $T_{\text{sample}}$  of 230 and 430 °C, respectively. The estimated total ratio of [Ba] to [S] is 1:2.7.

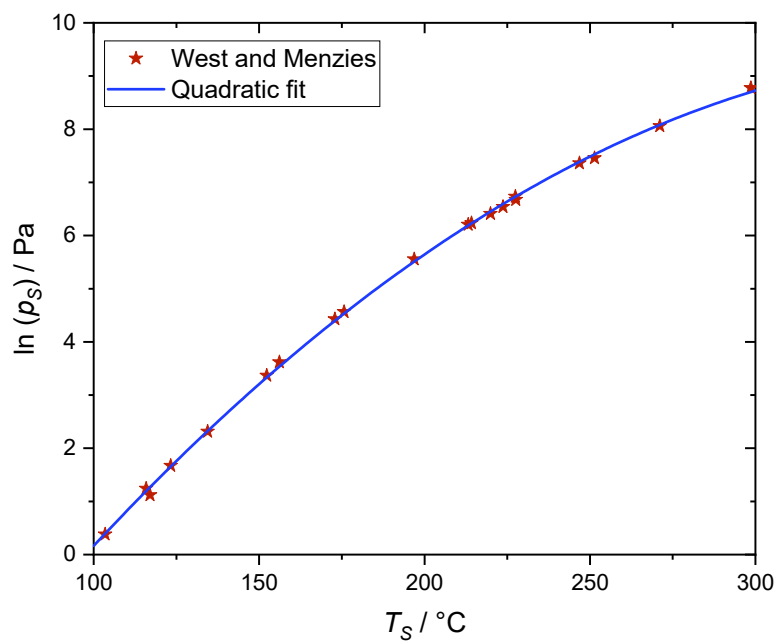

**Figure S4:** Relationship between  $T_S$  and  $p_S$ . Scatter points are taken from published experimental work.<sup>1</sup> The line is a least squares fit to the experimental data. The analytic form is given by  $\ln(p_S) = -7.715 + 9.08 \cdot 10^{-2} T_S - 1.20 \cdot 10^{-4} T_S^2$ .

#### REFERENCES

- (1) West, W. A.; Menzies, A. W. C. The Vapor Pressures of Sulphur between 100° and 550° with Related Thermal Data. *J. Phys. Chem.* **1929**, 33 (12), 1880–1892.  
<https://doi.org/10.1021/j150306a002>.
